# Supplementary material for: Development of five digits is controlled by a bipartite long-range cis -regulator
Source: Oxford University Press journal article supplement (doi:10.1242/dev.095430), 2014-04-08
Supplement: dev095430_supp.pdf [file dev095430_supp.pdf]

**Fig. S1. Details of the ZRS targeting constructs and representation of the correctly inserted into the locus before and after Cre-recombinase.** (A) The three constructs which were targeted into the endogenous ZRS (shown as a grey rectangle in the bottom line, with HindIII (H) sites at either end). These constructs comprise a 7kb region of genomic DNA flanked by NotI and Sall restriction sites (N and SI respectively), carrying a bacterial LacZ gene driven by a minimal  $\beta$ -globin promoter (inserted into a SmaI site (S)) and a Neomycin resistance (neo) resistance cassette driven by a PGK promoter. The mutated ETS site in ZRS<sup>ETS</sup> is indicated by the black rectangle. (B) The loci after correct targeting, which was screened for by PCR using primers 1f and 1r and 2f and 2r across homology arms 1 and 2 respectively. Mice carrying these chromosomes were genotyped for the presence of lacZ using primers Lf and Lr and for the presence of neomycin<sup>R</sup> using Nf and Nr. The unmodified wildtype chromosome was screened for using Wf and R. (C) The result of cre mediated excision of the lacZ and neomycin<sup>R</sup> cassettes which leaves only a single loxP site. Genotyping of mice with Wf and R or Df and R allows the modified and wildtype chromosomes to be distinguished because of the size difference created by the remaining lox site.

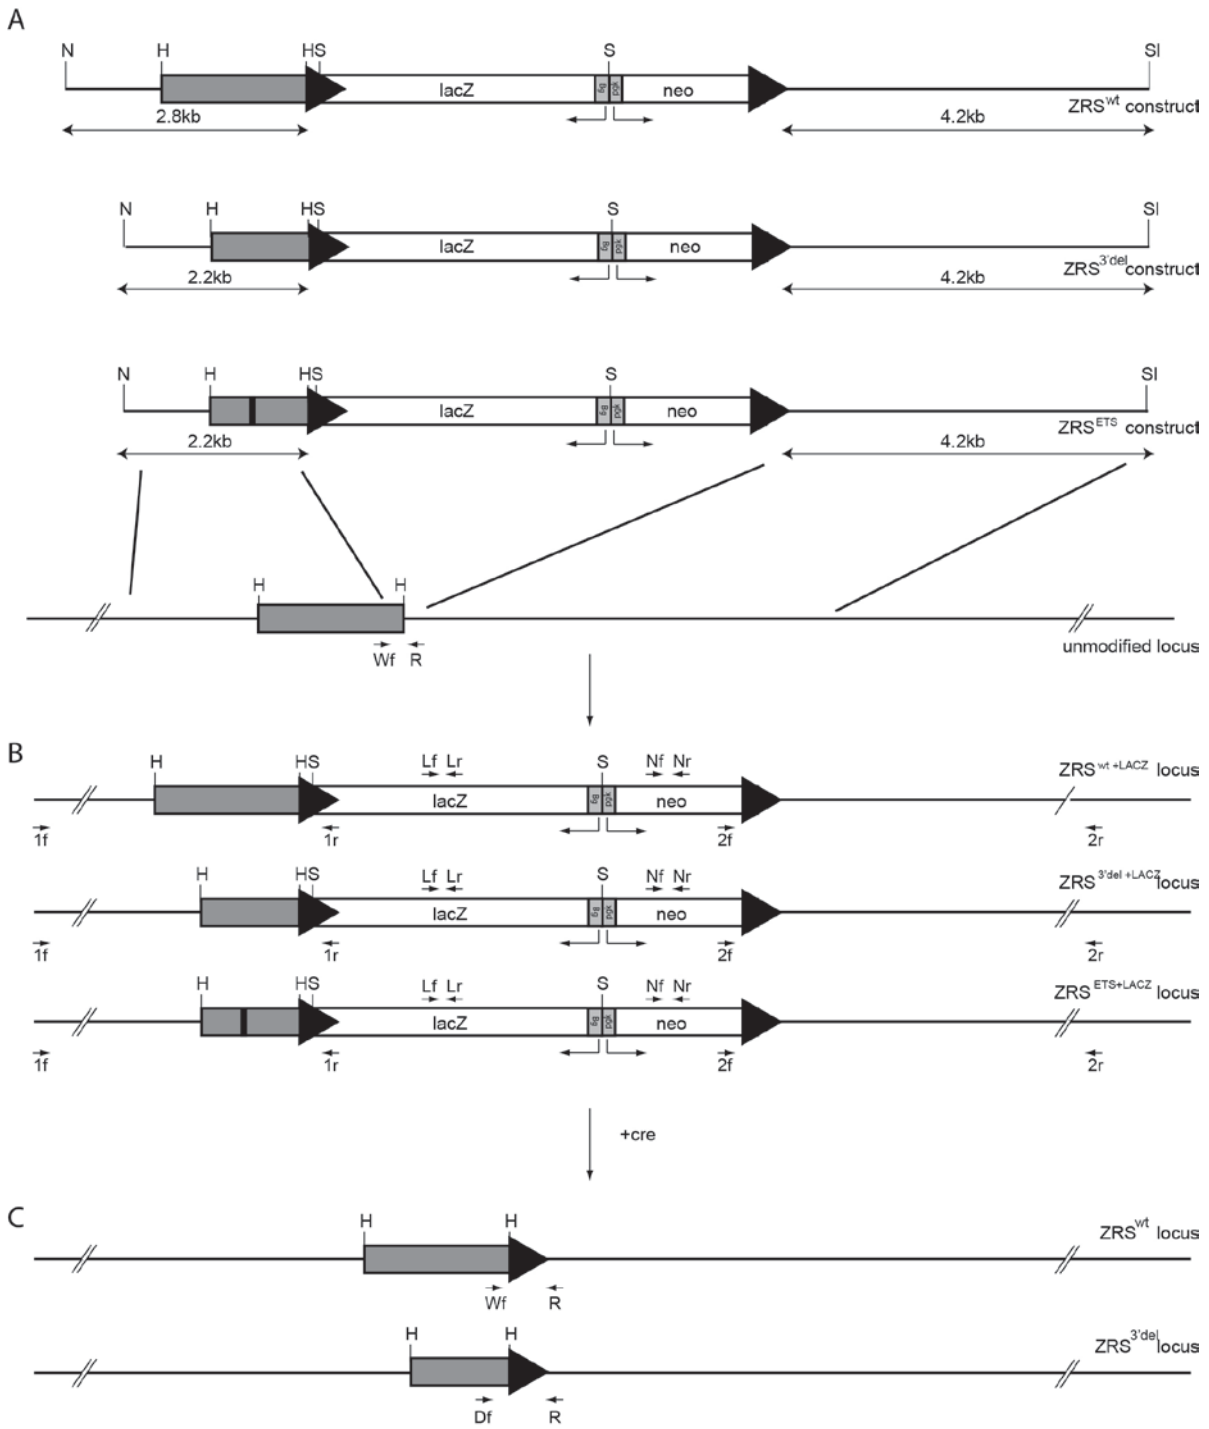

**Table S1. Primer sequences**

|                                        |                                                                                                                                                                                                                                                                                                                                    |  |
|----------------------------------------|------------------------------------------------------------------------------------------------------------------------------------------------------------------------------------------------------------------------------------------------------------------------------------------------------------------------------------|--|
| Constructs                             |                                                                                                                                                                                                                                                                                                                                    |  |
| DelA                                   | F- GAATTCTCAAGTATAAGAGAACATAG<br>R- gatcat <b>AAGCTT</b> AACAAGCAAAAATAAGAAAG                                                                                                                                                                                                                                                      |  |
| DelB                                   | F- GAATTCTCAAGTATAAGAGAACATAG<br>R- gatcat <b>AAGCTT</b> AAGATGGAGGCCTGAGAC                                                                                                                                                                                                                                                        |  |
| DelC                                   | F- GAATTCTCAAGTATAAGAGAACATAG<br>R- gatcat <b>AAGCTT</b> GCATCTGGTCATAAAATACAG                                                                                                                                                                                                                                                     |  |
| DelD                                   | F- GAATTCTCAAGTATAAGAGAACATAG<br>R- gatcat <b>AAGCTT</b> CATATTAACGTAAGTTAGTTC                                                                                                                                                                                                                                                     |  |
| 3' END                                 | F- gatcat <b>AAGCTT</b> TTTCTATCCTGTGTACAGTTTG<br>R- TACTAAGAAGGTGGCAACAGAC                                                                                                                                                                                                                                                        |  |
| Core                                   | F- gatcat <b>AAGCTT</b> AGTCCTGGCATAAACTTAAC<br>R- gatcat <b>AAGCTT</b> AAGATGGAGGCCTGAGAC                                                                                                                                                                                                                                         |  |
| Mutagenise Hx                          | F- GCTTGTTTTTTTTGCCACT <b>A</b> ATGATCCATAAATTGTTGGAAATGAG<br>R- CTCATTTCCAACAATTTATGGATCATT <b>A</b> GTGGCAAAAAACAAGC                                                                                                                                                                                                             |  |
| Mutagenise M100081                     | F- GTGACCTTGACTGT <b>G</b> TTTTATGACCAGATGACTTTTCCCCTCAG<br>R- CTGAGGGGAAAAGTCATCTGGTCATAAAA <b>C</b> ACAGTACAAGGTCAC                                                                                                                                                                                                              |  |
| -ETS                                   | F- GCACAAAATCTGAGGTCAC <b>T</b> <b>GAA</b> CTCTTAATTAGTTGCACTGACCAGG<br>R- CCTGGTCAGTGC <b>A</b> ACTAATTAAGAG <b>TTC</b> AAGTGACCTCAGATTTTGTGC                                                                                                                                                                                     |  |
| Mutagenise REP3A                       | F- GCTTGTTTTTTTTGCC <b>A</b> <b>CAG</b> TGATCCATAAATTGTTGGAAATGAGC<br>R- GCTCATTTC <b>A</b> ACAATTTATGGATCA <b>CTG</b> GTGGCAAAAAACAAGC                                                                                                                                                                                            |  |
| Mutagenise REP3B                       | F- GCTTGTTTTTTTTGCC <b>A</b> <b>A</b> TTGATCCATAAATTGTTGGAAATGAGC<br>R- GCTCATTTC <b>A</b> ACAATTTATGGATCA <b>ATT</b> GTGGCAAAAAACAAGC                                                                                                                                                                                             |  |
| Flip80<br>Region flipped is underlined | Arm 1 gatcat <b>AAGCTT</b> TTTAATGCCTATCATTGATTTGAAGTC and<br><u>ATAAATTGTTGGAAATGAGCGATT</u> CAGGAAGTGCTGCTTAGTGTTAGTGCCAAATGCGCTAACAAGCAA<br>AAATAATGAAAGAATC<br>Arm 2<br><u>AAGCAGCACTTCCTGAATCGCTCATTTC</u> ACAATTTATGGATCATCAGTGGCAAAAAAACTCAGTCT<br>GGTTCTGCTG<br>and gatcat <b>AAGCTT</b> ACATAGCAACAGTTAGTGAGATATG         |  |
| Flip80 +Hx                             | Arm 1 gatcat <b>AAGCTT</b> TTTAATGCCTATCATTGATTTGAAGTC and<br><u>ATAAATTGTTGGAAATGAGCGATT</u> CAGGAAGTGCTGCTTAGTGTTAGTGCCAAATGCGCTAACAAGCAA<br>AAATAATGAAAGAATC<br>Arm 2<br><u>AAGCAGCACTTCCTGAATCGCTCATTTC</u> ACAATTTATGGATCA <b>T</b> AGTGGCAAAAAAACTCAGTCT<br>GGTTCTGCTG<br>and gatcat <b>AAGCTT</b> ACATAGCAACAGTTAGTGAGATATG |  |
| Flip80+Rep3A                           | Arm 1 gatcat <b>AAGCTT</b> TTTAATGCCTATCATTGATTTGAAGTC and                                                                                                                                                                                                                                                                         |  |

|                                           |                                                                                                                                                                                                                                                                 |                                         |
|-------------------------------------------|-----------------------------------------------------------------------------------------------------------------------------------------------------------------------------------------------------------------------------------------------------------------|-----------------------------------------|
|                                           | ATAAATTGTTGGAAATGAGCGATTCAGGAAGTGCTGCTTAGTGTTAGTGGCAAATGCGCTAACAAGCAA<br>AAATAATGAAAGAATC<br>Arm 2<br>AAGCAGCACTTCCTGAATCGCTCATTCCAACAATTTATGGATCACTGGTGGCAAAAAAACTCAGTCT<br>GGTTCTGCTG<br>and gatcat <b>AAGCTT</b> ACATAGCAACAGTTAGTGAGATATG                   |                                         |
| FLIP49<br>Region flipped is<br>underlined | Arm 1 gatcat <b>AAGCTT</b> TTTAATGCCTATCATTGATTTGAAGTC and<br>CGTTCATTGGATTCTTTCATTATTTTTGCTTGTTTTTTTTGCCACTGATCTCATGGAGTCCCAGGC<br>Arm 2 <u>AACAAGCAAAAATAATGAAAGAATCCAATGAACGGATCCATAAATTGTTGGAAATG</u><br>and gatcat <b>AAGCTT</b> ACATAGCAACAGTTAGTGAGATATG |                                         |
| FLIP49+REP3A                              | Arm 1 gatcat <b>AAGCTT</b> TTTAATGCCTATCATTGATTTGAAGTC and<br>CGTTCATTGGATTCTTTCATTATTTTTGCTTGTTTTTTTTGCCACCTGCTCATGGAGTCCCAGGC<br>Arm 2 <u>AACAAGCAAAAATAATGAAAGAATCCAATGAACGGATCCATAAATTGTTGGAAATG</u><br>and gatcat <b>AAGCTT</b> ACATAGCAACAGTTAGTGAGATATG  |                                         |
| REP5                                      | Arm1- GAATTCTCAAGTATAAGAGAACATAG and<br>CATTATTTTTGCTTGTTTTTTTTGCTTGATCCATAAATTGTTGGAAATGAGC<br>Arm 2- GCTCATTCCAACAATTTATGGATCACTGCAGGCCAAAAAAACAAGCAAAAATAATG and<br>TACTAAGAAGGTGGCAACAGAC                                                                   |                                         |
| Del41                                     | Arm 1 gatcat <b>AAGCTT</b> TTTAATGCCTATCATTGATTTGAAGTC and<br>GTACTGTATTTTATGACCAGATGACAGAGAGTAGGAAGTCCAGCCTGG<br>Arm 2 CCAGGCTGGACTTCTACTCTCTGTCTATCTGGTCATAAAATACAGTAC<br>and gatcat <b>AAGCTT</b> ACATAGCAACAGTTAGTGAGATATG                                  |                                         |
| Shh promoter<br>ATG is underlined         | F- gatcat <b>GTCGAC</b> TAAACTGGAAGCCTCAGGTG<br>R- gatcat <b>GGTACC</b> ATCTCGTCCGCGGAACCTGAG                                                                                                                                                                   |                                         |
|                                           |                                                                                                                                                                                                                                                                 |                                         |
| ES cell targeting<br>screening            |                                                                                                                                                                                                                                                                 |                                         |
| Arm 1                                     | 1f- ATGGCACTGAAGTGTTGACTG<br>1r- CACTGCATTCTAGTTGTGG                                                                                                                                                                                                            |                                         |
| Arm 2                                     | 2f- ATCGCATTGTCTGAGTAGGTG<br>2r- GACCAATAGTACTCCAAGCAAG                                                                                                                                                                                                         |                                         |
|                                           |                                                                                                                                                                                                                                                                 |                                         |
| Genotyping                                |                                                                                                                                                                                                                                                                 | Allele size                             |
| lacZ                                      | LF- CAACTTAATCGCCTTGACAGCAC<br>LR- CGCTGATTTGTGTAGTCGGTT                                                                                                                                                                                                        | +lacZ - 550bp                           |
| Neo                                       | NF- TGTTCCGGCTGTCAGCGCAG<br>NR- GATATTCGGCAAGCAGGCATC                                                                                                                                                                                                           | +neo - 480bp                            |
| ZRS <sup>Del</sup>                        | DF- CCAAGCAACATGACAGCAC<br>R- CACACACGGATACTAAGACGG                                                                                                                                                                                                             | Wt- 950bp<br>ZRS <sup>Del</sup> - 440bp |
| ZRS <sup>Wt</sup>                         | WF- GGAATGCATGCAGGAACCTCAG<br>R- CACACACGGATACTAAGACGG                                                                                                                                                                                                          | Wt- 290 bp<br>ZRS <sup>Wt</sup> - 380bp |

|         |                                                          |  |
|---------|----------------------------------------------------------|--|
|         |                                                          |  |
| qRT-PCR |                                                          |  |
| Shh     | F- ACCCCGACATCATATTTAAGGA<br>R- TTAAC TTGTCTTTGCACCTCTGA |  |
| B-gal   | F- ATGGATGAGCAGACGATGG<br>R- CGGCGTTAAAGTTGTTCTGC        |  |

**Table S2. Fosmid Probes**

| Region     | Whitehead<br>(Sanger)<br>Name | Ensemble name | Coordinates |          | Size<br>(bp) |
|------------|-------------------------------|---------------|-------------|----------|--------------|
|            |                               |               | Start       | End      |              |
| <i>Shh</i> | WI1-574O18                    | G135P64333A4  | 28754458    | 28795879 | 41421        |
| ZRS        | WI1-1047E14                   | G135P600929F6 | 29611727    | 29653695 | 41968        |

Names are Ensembl (r 45) ([http://jun2007.archive.ensembl.org/Mus\\_musculus/index.html](http://jun2007.archive.ensembl.org/Mus_musculus/index.html)). Mouse genome assembly number: NCBI m37.

**Table S3. Co-localisation frequency of the *Shh* probe with the ZRS and *LacZ* reporter construct probes for E11.5 limb bud sections**

| Limb region | <i>Shh</i> -ZRS<br>(847 kb)   | <i>Shh</i> -LacZ<br>(847 kb) | Probe pairs                         | ZPA                           | Proximal   |
|-------------|-------------------------------|------------------------------|-------------------------------------|-------------------------------|------------|
|             | Co-localisation frequency (%) |                              |                                     | Co-localisation frequency (%) |            |
| ZPA         | 35.1                          | 11.9                         | <i>Shh</i> -ZRS<br><i>Shh</i> -LacZ | 35.1                          | 22.7       |
| Proximal    | 22.7                          | 19.3                         |                                     | 11.9                          | 19.3       |
|             | $p = 0.04$                    | $p = 0.29$                   |                                     | $p = 0.0002$                  | $p = 0.63$ |

Statistical analysis of data for Figure 5J-  $p$ -values from Fisher's Exact Tests.

**Table S4. Frequency of *Shh*-ZRS and *Shh*-LacZ probes separated by  $\geq 400$ nm for E11.5 limb bud sections**

| Probe pairs               | ZPA                         | Proximal     |
|---------------------------|-----------------------------|--------------|
|                           | Frequency (%) $\geq 400$ nm |              |
| <i>Shh</i> -ZRS (847 kb)  | 18.3                        | 11.1         |
| <i>Shh</i> -LacZ (847 kb) | 39.5                        | 30.5         |
|                           | $p = 0.0011$                | $p = 0.0012$ |

Statistical analysis of data for Figure 5J-  $p$ -values from Fisher's Exact Tests

**Table S5. Co-localisation frequency of the *Shh* probe with the ZRS probe for E11.5 limb bud sections derived from the fore limbs of ZRS<sup>wt/wt</sup> and ZRS<sup>3'del/3'del</sup> homozygous embryos**

| Forelimb             | <i>Shh</i> -ZRS in<br>ZRS <sup>wt/wt</sup><br>(847 kb) | <i>Shh</i> -ZRS in<br>ZRS <sup>3'del/3'del</sup><br>(847 kb) | Probe pairs                                                                              | ZPA/<br>Distal<br>posterior   | Proximal |
|----------------------|--------------------------------------------------------|--------------------------------------------------------------|------------------------------------------------------------------------------------------|-------------------------------|----------|
|                      | Co-localisation frequency (%)                          |                                                              |                                                                                          | Co-localisation frequency (%) |          |
| ZPA/Distal posterior | 38                                                     | 20                                                           | <i>Shh</i> -ZRS in ZRS <sup>wt/wt</sup><br><i>Shh</i> -ZRS in ZRS <sup>3'del/3'del</sup> | 38                            | 21       |
| Proximal             | 21                                                     | 20                                                           |                                                                                          | 20                            | 20       |
|                      | $p = 0.01$                                             | $p = 1$                                                      |                                                                                          | $p = 0.008$                   | $p = 1$  |

Statistical analysis of data for Figure 5J-  $p$ -values from Fisher's Exact Tests

**Table S6. Co-localisation frequency of the *Shh* probe with the ZRS probe for E11.5 limb bud sections derived from the hind limbs of ZRS<sup>wt/wt</sup> and ZRS<sup>3'del/3'del</sup> homozygous embryos**

| Hindlimb | <i>Shh</i> -ZRS in ZRS <sup>wt/wt</sup> (847 kb) | <i>Shh</i> -ZRS in ZRS <sup>3'del/3'del</sup> (847 kb) | Probe pairs                                                                              | ZPA                           | Proximal        |
|----------|--------------------------------------------------|--------------------------------------------------------|------------------------------------------------------------------------------------------|-------------------------------|-----------------|
|          | Co-localisation frequency (%)                    |                                                        |                                                                                          | Co-localisation frequency (%) |                 |
| ZPA      | 39.1                                             | 26.9                                                   | <i>Shh</i> -ZRS in ZRS <sup>wt/wt</sup><br><i>Shh</i> -ZRS in ZRS <sup>3'del/3'del</sup> | 39.1                          | 24.2            |
| Proximal | 24.2                                             | 22.5                                                   |                                                                                          | 26.9                          | 22.5            |
|          | <i>p</i> = 0.009                                 | <i>p</i> = 0.45                                        |                                                                                          | <i>p</i> = 0.04               | <i>p</i> = 0.88 |

Statistical analysis of data for Figure 5J- *p*-values from Fisher's Exact Tests
